# Supplementary figures and images for: Measurement of Calprotectin (S100A8/A9) in the Saliva of Pigs: Validation Data of A Commercially Available Automated Assay and Changes in Sepsis, Inflammation, and Stress
Source: MDPI journal article supplement (doi:10.3390/ani13071190), 2023-03-29

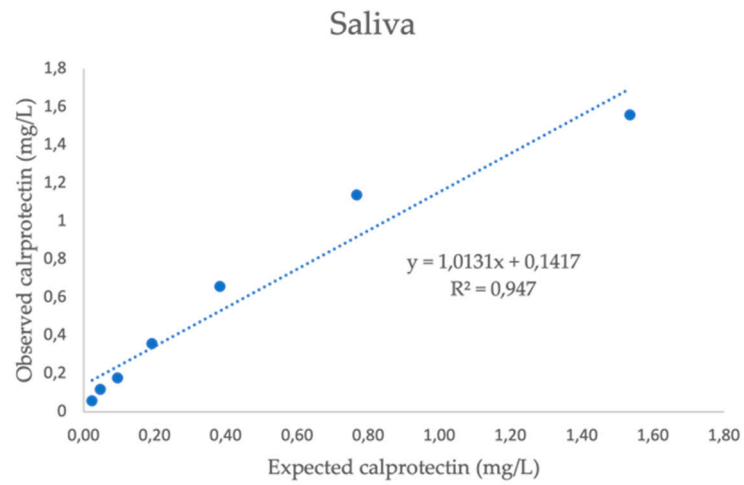

**Supplementary Figure S1.** Linearity under the dilution of saliva calprotectin assay.

Supplement: s1 [file s1]
